# Supplementary material for: Comprehensive effect of tuning Cu/SAPO-34 crystals using PEG on the enhanced hydrothermal stability for NH3-SCR
Source: Royal Society of Chemistry journal article supplement (doi:10.1039/d1cy01194d), 2021-01-01
Supplement: d1cy01194d1.pdf [file d1cy01194d1.pdf]

1 **SUPPLEMENTARY MATERIAL**

2 **Comprehensive effect of tuning Cu/SAPO-34 crystals by PEG on the**  
3 **enhanced hydrothermal stability for NH<sub>3</sub>-SCR**

4  
5 Qingjin Lin <sup>a</sup>, Shuang Liu <sup>b</sup>, Shuhao Xu <sup>c</sup>, Shi Xu,<sup>d</sup> Mingming Pei <sup>c</sup>, Pan Yao <sup>b</sup>, Haidi Xu  
6 <sup>b,e,f\*</sup>, Yi Dan <sup>a,\*</sup>, Yaoqiang Chen <sup>c,e,f</sup>

7 <sup>a</sup> State Key Laboratory of Polymer Materials Engineering, Polymer Research Institute,  
8 Sichuan University, Chengdu 610064, P. R. China.

9 <sup>b</sup> Institute of New Energy and Low-Carbon Technology, Sichuan University, Chengdu 610064,  
10 P. R. China.

11 <sup>c</sup> Key Laboratory of Green Chemistry and Technology, Ministry of Education, College of  
12 Chemistry, Sichuan University, Chengdu 610064, Sichuan, China.

13 <sup>d</sup> Weichai Power Co., Ltd, Guangxi, China.

14 <sup>e</sup> Center of Engineering of Vehicular Exhaust Gases Abatement, Chengdu 610064, Sichuan,  
15 China.

16 <sup>f</sup> Center of Engineering of Environmental Catalytic Material, Chengdu 610064, Sichuan, China.

17

18

19 \* Corresponding Authors: Tel. /Fax: +86 28 85418451

20 \* E-mail: xuhaidi@scu.edu.cn; danyi@scu.edu.cn

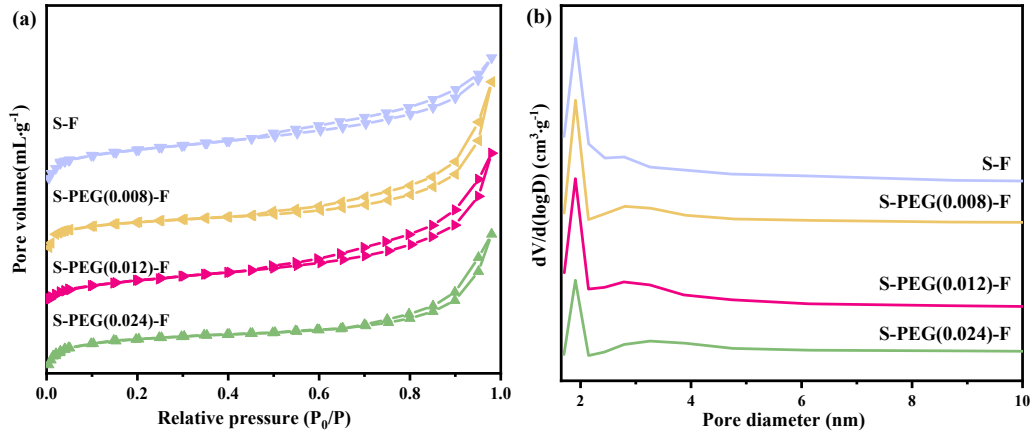

21

22 **Fig. S1.** (a) N<sub>2</sub> isotherms of fresh zeolite and (b) their size distributions via BJH algorithm using the desorption Branch.

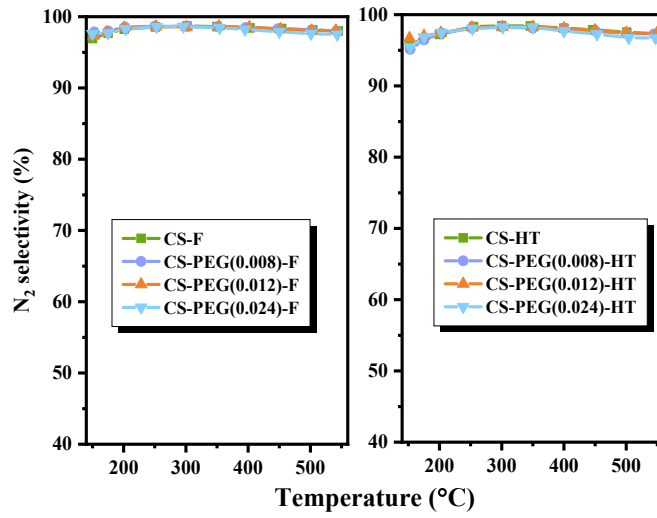

23

24 **Fig. S2.** N<sub>2</sub> selectivity on fresh and hydrothermally aged catalysts.

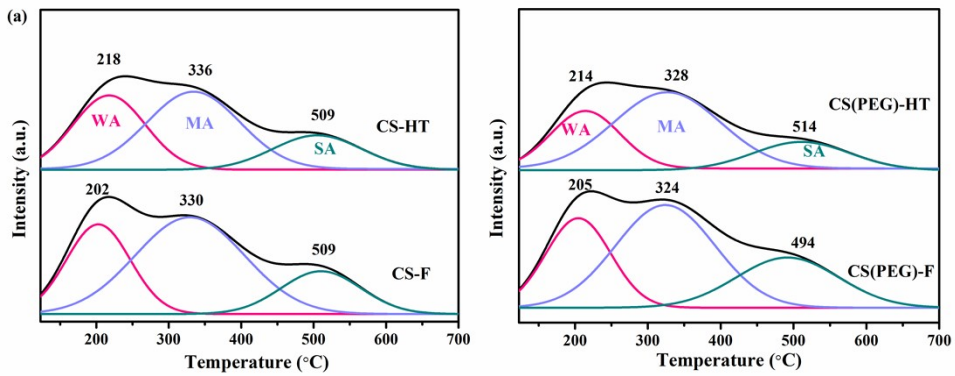

25

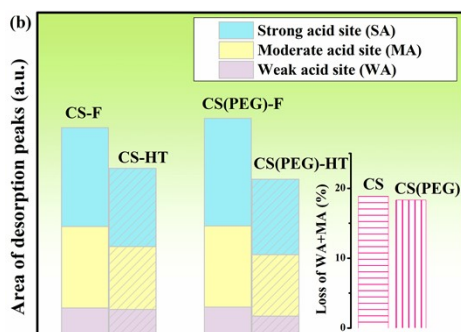

26  
 27 **Fig. S3.** (a)  $\text{NH}_3$ -TPD profiles of CS-F/HT and CS(PEG)-F/HT, and (b) quantified areas of  $\text{NH}_3$ -TPD.

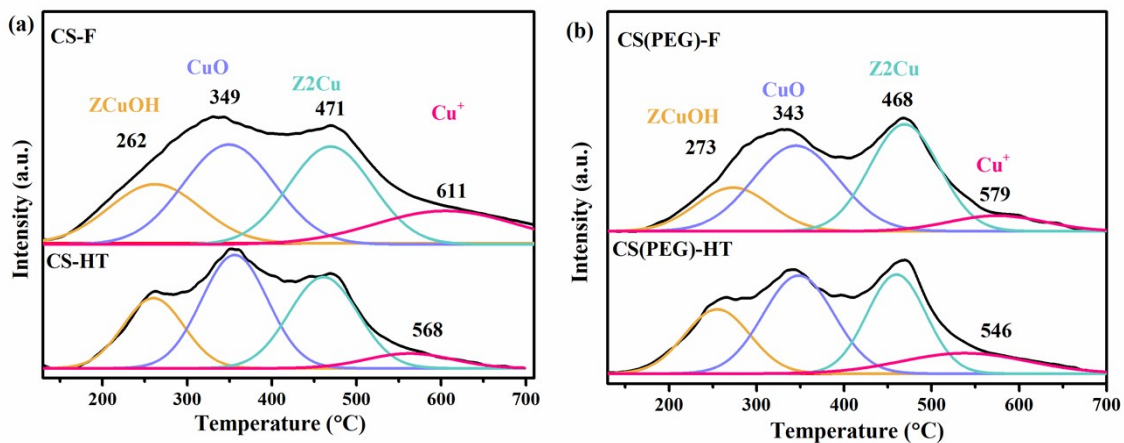

28  
 29 **Fig. S4.**  $\text{H}_2$ -TPR of (a) CS-F/HT and (b) CS(PEG)-F/HT.

30  
 31  
 32
